1  
2  
3  
4  
5  
6  
7  
8  
9  
10  
11  
12  
13  
14  
15  
16

**Last and corresponding authorship practices in ecology**

Meghan A. Duffy

Department of Ecology and Evolutionary Biology

University of Michigan

Ann Arbor, MI 48109

[duffymeg@umich.edu](mailto:duffymeg@umich.edu)

Submitted to *Ecology and Evolution* April 25, 2017

Running head: Authorship practices in ecology

17 **Abstract**

18 Authorship is intended to convey information regarding credit and responsibility for manuscripts.  
19 However, while there is general agreement within ecology that the first author is the person who  
20 contributed the most to a particular project, there is less agreement regarding whether being last  
21 author is a position of significance and regarding what is indicated by someone being the  
22 corresponding author on a manuscript. Here, I use a combination of a survey and an analysis of  
23 the literature to show that: 1) most ecologists view the last author as the “senior” author on a  
24 paper (that is, the person who runs the research group in which most of the work was carried  
25 out), 2) 84% of papers published in 2016 in the first and/or second issues of *American Naturalist*,  
26 *Ecology*, *Evolution*, and *Oikos* had the first author as corresponding author, and 3) most  
27 ecologists view the corresponding author as the person taking full responsibility for a paper.  
28 However, there was substantial variation in views on authorship, especially corresponding  
29 authorship. Given these results, I suggest that discussions of authorship have as their starting  
30 point that the first author will be corresponding author and the senior author will be last author,  
31 while noting that it will be necessary in some cases to deviate from these defaults.

## 32 **Introduction**

33           Who is the last author on a paper? Depending on authorship conventions in a field, the  
34 last author might be the person whose surname comes last alphabetically, the person who runs  
35 the research group where the research was done, or simply the person who did the least work on  
36 the project (Tschardt et al. 2007). In math, for example, authorship tends to be determined  
37 alphabetically (Waltman 2012), whereas in biomedical fields, the last author position is one that  
38 tends to carry extra weight (Moulopoulos et al. 1983, Wren et al. 2007, Venkatraman 2010). In  
39 ecology, alphabetical author lists are not the norm, but standard authorship practices have  
40 received relatively little study. Thus, we are in a similar situation to the one described in 1997 by  
41 Rennie et al. when they discussed order of authorship and what it conveys: “Everyone is equally  
42 sure about their own system; the point is that none of these schemes is actually disclosed, so the  
43 readers, to whom this should be addressed, are not let in on the secret: they have not been told  
44 which code book to use and how it works.” The goal of this study is to describe the current  
45 systems in use by ecologists regarding last and corresponding authorship, to see whether certain  
46 factors (e.g., research area, career stage) are associated with those views, and to see if the  
47 number of authors and the position of the corresponding author have changed over time.

48           As noted in an earlier publication on this topic (Tschardt et al. 2007), the first author of  
49 an ecology paper is generally the person who made the greatest overall contribution to the work,  
50 but there is no consensus on how to determine the order of the remaining authors. In a survey of  
51 57 ecologists at the 2004 meeting of the Ecological Society of America, respondents gave ten  
52 unique authorship order combinations for a scenario involving only three potential coauthors  
53 (Weltzin et al. 2006). There is also confusion over what is signified by corresponding authorship  
54 (Laurance 2006).

55           This is problematic for two reasons. First, people are judged based on their publication  
56 records, meaning that unclear authorship criteria make it difficult to determine how much credit  
57 an author should get for a publication (Tscharntke et al. 2007, Wren et al. 2007, Eggert 2011).  
58 Job applications, grant proposals, and tenure and promotion decisions are all impacted by  
59 publication records. If people judging these applications, proposals, and dossiers have different  
60 views on what it means to be last or corresponding author, that means those are not reliable  
61 signals. This can be problematic if, for example, an assistant professor puts herself as last author  
62 as an indicator of having led the work, but a tenure letter writer perceives her as last because she  
63 did the least work. Second, authorship on a publication entails not just credit for the work, but  
64 responsibility for it as well (Rennie et al. 2000, Venkatraman 2010, Eggert 2011). In cases where  
65 concerns about research are raised, it is important to know, for example, if corresponding  
66 authorship indicates that someone is taking full responsibility for the publication.

67           In this study, I first present results of a survey of scientists (80% of whom identified  
68 ecology as their primary research area) that asked about views on last and corresponding  
69 authorship. In addition to giving information on overall views of ecologists on last and  
70 corresponding authorship, the survey allowed me to explore whether factors such as research  
71 subfield, time since PhD, geographic location, and amount of interdisciplinary work were  
72 associated with views on last and corresponding authorship. I also present data on the number of  
73 authors over time as well as the position of the corresponding author over time in four journals  
74 (*American Naturalist*, *Ecology*, *Evolution*, and *Oikos*). I end by suggesting that, since most  
75 readers expect authors to use a first-last author emphasis (FLAE, sensu Tscharntke et al. 2007)  
76 and since the vast majority of papers in *American Naturalist*, *Ecology*, *Evolution*, and *Oikos* have  
77 the first author as the corresponding author, those are good starting places for discussions

78 regarding author order and corresponding authorship (while recognizing that there will be  
79 situations where it is desirable or necessary to deviate from this).

80

## 81 **Methods**

### 82 *Poll*

83 I carried out a poll of readers of the *Dynamic Ecology* blog. In addition to appearing on the blog,  
84 the poll was advertised via social media and thus likely reached a wider readership than a typical  
85 blog post. The poll first appeared on 6 April 2016 and ran for two weeks. After removing four  
86 blank responses, there were 1122 responses to the poll.

87 The poll had four main questions: 1) For ecology papers, do you consider the last author  
88 to be the senior author? 2) Which of the following statements most closely matches the current  
89 norms in ecology in terms of who is corresponding author? 3) Which of the following statements  
90 would be best practice in terms of who is corresponding author? and 4) If someone includes a  
91 statement on his/her CV indicating they have used a first/last author emphasis, do you pay  
92 attention to that? The poll also asked about the respondent's primary research area, whether their  
93 research is primarily basic or applied, how frequently they conduct interdisciplinary research,  
94 how many years post-PhD they are, where they live, and what their current department is. The  
95 full survey, including the questions and all the answer options, is given in the Supplement.

96 In addition to presenting the overall responses to the four main questions, I used the  
97 additional information on research area, geographic location, years since degree, department  
98 type, and amount of interdisciplinary work to look for factors associated with views on last and  
99 corresponding authorship. Prior to doing those analyses, I decided that a difference between two  
100 groups in their views on authorship had to be at least 10% in order to be considered notable.

101 While this threshold is somewhat arbitrary, it helped ensure that small differences weren't  
102 overinterpreted.

103

104 *Literature survey*

105 I reviewed the first or second issue of the journal *Ecology* every ten years from 1956-  
106 1996 and every five years thereafter. In most years, I looked at the first issue but, in two cases,  
107 the first issue contained a special feature. In order to avoid any potential confounding effects of  
108 those features, I looked at the second issue in those two cases. I supplemented this analysis with  
109 a similar analysis of papers in the first issue of *Evolution*, the first and second issues of *American*  
110 *Naturalist*, and the first issue of *Oikos* every five years from 2001-2016. (Each *American*  
111 *Naturalist* issue contains fewer papers, hence using two issues per year. Also note that, in 2001  
112 and 2006, each *Oikos* issue was a different volume. In those cases, I used the January issue.) For  
113 each paper, I recorded the number of authors as well as the position of the corresponding author.  
114 *Ecology* began including author email addresses in the late 1990s. Thus, for 1956-1996, I noted  
115 whether there was a note indicating to whom correspondence (or reprint requests) should be sent.  
116 For 2001-2016, I determined corresponding authorship based on the following criteria: 1) If an  
117 email address was given for only one author, I indicated that person as the corresponding author.  
118 2) In some cases, email addresses were given for multiple authors but one author was indicated  
119 as the one to whom correspondence should be addressed; in these cases, only the author  
120 designated for correspondence was considered the corresponding author. 3) If the email  
121 addresses were given for multiple authors and there was no note regarding correspondence, I  
122 considered all the authors who had email addresses as corresponding author. 4) In a few cases,  
123 no author had an email address; in these cases, I said that the corresponding author was not

124 designated. Corresponding authorship was then grouped into six categories: 1) “first” (the first or  
125 only author in the author string was the corresponding author), 2) “middle” (someone other than  
126 the first or last author was the corresponding author), 3) “last” (the last author was corresponding  
127 author), 4) “ND” (when corresponding authorship was not designated), 5) “all” (when both – for  
128 papers with only two authors – or all of the authors on a paper were corresponding author), and  
129 6) “other” (when some other combination of authors – such as the first and last – were  
130 corresponding author). For one paper in *Oikos*, an email address was given but it was not  
131 possible to determine which author the email address corresponded to; this paper was omitted  
132 from the analysis.

133

#### 134 *Data and code*

135 Figures were made in R (v3.3.3) using the ggplot, cowplot, and Likert packages. Data and code  
136 for the analyses and plots of the poll and the literature survey are available at:

137 <https://github.com/duffymeg/DEAuthorshipPoll>

138

## 139 **Results**

### 140 *Demographics of poll respondents*

141 80% of respondents indicated that ecology was their primary research field (Table 1). Most poll  
142 respondents were current students (28%) or received their PhD within the past 1-5 years (31%),  
143 but respondents included people in all categories, including those who received their PhD over  
144 20 years ago (Table 2). The vast majority of the poll respondents live in North America (64%) or  
145 Europe (26%; Table 3).

146

147 *Views on last authorship*

148 For ecology papers, most respondents viewed the last author as the senior author (that is, the lab  
149 head or principle investigator; Figure 1A). However, this view is not unanimous: the three “no”-  
150 related answers garnered 14% of the responses. One way of possibly reducing confusion about  
151 whether the last author is the senior author would be to include a note on one’s CV indicating  
152 that the last author position is one of emphasis. However, the poll results suggest this is likely to  
153 only be partially effective – 29% of respondents said they do not or would not pay attention to  
154 these statements (Figure 1B).

155 Year of degree (as a proxy for career stage) did not strongly influence views on last  
156 authorship (Figure 2A); aside from the small group of respondents who do not have PhDs and  
157 are not current students, there was very little variation. North American respondents were more  
158 likely to say the last author is not the senior author, as compared to Europeans (18% “no”  
159 responses vs. 5%, respectively; Figure 2B). Looking at primary research area, the two evolution  
160 categories had the highest proportion of positive responses to the question about whether the last  
161 author was the senior author, with ecologists being somewhat less likely to give one of the “yes”  
162 responses (as compared to evolutionary biologists; Figure 2C). People in Biology and EEB  
163 departments were more likely to view the last author as the senior author, compared to those in  
164 Natural Resources departments or other types of departments (Figure 2D). Finally, while there  
165 was no notable difference based on whether someone did basic vs. applied research (Figure 2E),  
166 there was a monotonic decrease in the “yes” responses with increasing frequency of  
167 interdisciplinary research: 90% of those who never do interdisciplinary research view the last  
168 author as the senior author, as compared to only 78% of those who always do interdisciplinary  
169 research (Figure 2F).



170

171 *Views on corresponding authorship*

172 There was substantial variation in respondents' views on current and best practices for  
173 corresponding authorship (Figure 3). Most respondents (54%) said that the corresponding author  
174 “uploaded the files, managed the revisions and wrote the response to reviewers, and took  
175 responsibility for the paper after publication”. The next most common response (19% of  
176 respondents) was that the current practice is that the corresponding author is the person who  
177 simply uploaded the files – though only 8% viewed this as best practice. Only 7% said that the  
178 current practice is that the corresponding author is the senior author.

179 More senior respondents (those who received their PhDs 11 or more years ago) were less  
180 likely to choose the “full responsibility” option (that is, to say the corresponding author  
181 “uploaded the files, managed the revisions and wrote the response to reviewers, and took  
182 responsibility for the paper after publication”; Figure 4A). Evolutionary biologists were  
183 somewhat less likely to choose the “full responsibility” option than ecologists (46% vs. 55%,  
184 respectively; Figure 4B). People in EEB departments were more likely to choose the “full  
185 responsibility” option than those in Biology departments (60% vs. 50%, respectively; Figure  
186 4C). There were no notable differences in the ways people in Europe vs. North America viewed  
187 current corresponding authorship practices (Figure 4D).

188

189 *Authorship over time*

190 The number of authors on *Ecology* papers is increasing over time, with a particularly notable  
191 uptick after 1996 (Figure 5A). Between 1956 and 1996, the corresponding author on a paper was  
192 not usually indicated and mailing addresses for all authors were given. Of the 129 papers

193 analyzed during that window, only two indicated the author to whom correspondence should be  
194 addressed. Interestingly, in one of these cases (Kalisz and Teeri 1986) the first author was  
195 indicated, whereas in the other (Murcia and Feinsinger 1996) the second author was indicated.

196 Since 2001, the proportion of first authors as corresponding author has increased in  
197 *American Naturalist*, *Evolution*, and *Oikos*, but remained stable in *Ecology*. In 2001 and 2006, it  
198 was fairly common for email addresses to be given for no authors, for all authors, for just a  
199 middle author, or for multiple authors (e.g., first and third authors). For the 2016 papers  
200 analyzed, the corresponding author was usually the first author (84%); less commonly, it was the  
201 last author (14%).

202

## 203 **Discussion**

204 Most ecologists view the last author as a position of emphasis in a paper, though this  
205 view is not universal. Most ecologists view the corresponding author as the person taking full  
206 responsibility for a paper, but, again, the survey revealed variation in views regarding current  
207 and best practices for corresponding authorship. Prior to the late 1990s, it was rare for the  
208 corresponding author of a paper to be designated; at present, the first author is usually the  
209 corresponding author, with the last author being the corresponding author in a minority of cases.  
210 Overall, there is variation in views on corresponding and last authorship in ecology, and the field  
211 would benefit from greater consensus on what is signified by corresponding and last authorship.

212 At the risk of stating the obvious, decisions about who should be last and/or  
213 corresponding author are only necessary if there is more than one author. Thus, the trend in  
214 ecology towards having more authors on papers (Figure 5), as also seen by others (Johnson 2006,

215 Weltzin et al. 2006, Fox et al. 2016, Logan 2016), means that there are more decisions to be  
216 made regarding authorship, including last and corresponding authorship.

217 Over the past several decades, various systems for attempting to indicate how much  
218 different authors contributed to multiauthor papers have been proposed (e.g., Davis and  
219 Gregerman 1969, Mouloupoulos et al. 1983, Rennie et al. 1997, Weltzin et al. 2006). A common  
220 suggestion is to use author contribution statements (e.g., Mouloupoulos et al. 1983, Rennie et al.  
221 1997, Cozzarelli 2004). While author contribution statements do have the potential to remove  
222 ambiguity about whether the last author is a position of emphasis, they have several problems  
223 themselves. First, unless the full author contribution statements are put on a CV for every  
224 publication, people reviewing job, grant, or award applications are unlikely to see them  
225 (especially at earlier stages of screening). Second, and more problematically, people do not  
226 necessarily trust author contribution statements (Venkatraman 2010, Fox 2016): in a different  
227 poll done on the Dynamic Ecology blog, only 41% of respondents indicated that author  
228 contribution statements are always or usually accurate in their experience (Fox 2016).

229 Thus, attempting to infer the contributions of different authors from the order of  
230 authorship is likely to continue. The results of this survey demonstrate that, at present, most  
231 ecologists tend to view the last author as the senior author (Figure 1). Therefore, when discussing  
232 authorship, ecologists should assume that most people will interpret authorship order assuming a  
233 first-last author emphasis (FLAE), viewing the last author as the senior author. As a result, I  
234 recommend that discussions regarding authorship should have as their starting point that the  
235 senior author will be the last author. However, a problem arises when multiple groups  
236 collaborate, making it so that there is not one “senior” author. In some fields, footnotes  
237 indicating multiple last authors have started to become more common, but such footnotes are not

238 currently common in ecology. A recent study found that only ~25% of last authors in the journal  
239 *Functional Ecology* were women (Fox et al. 2016). It is likely that at least some of this pattern  
240 can be attributed to women being more likely to leave science, leading to fewer women as senior  
241 authors (Fox et al. 2016). At the same time, the same biases that contribute to women  
242 disproportionately leaving science (e.g., Moss-Racusin et al. 2012)) might also influence  
243 decisions regarding which author is viewed as “senior” (and, therefore, in the emphasized last  
244 author position). Given the continued potential for confusion regarding what is conveyed by  
245 authorship order – especially in more complicated situations arising from collaborations between  
246 multiple research groups – and given the high stakes of tenure and promotion decisions, it might  
247 be advisable to include a short paragraph in the dossier that describes the authorship system that  
248 was used (e.g., a first-last author emphasis system) and noting exceptions (e.g., for a high profile  
249 paper based on work done in several different research groups).

250         Of the papers published in 2016 that were examined for this study, 84% had the first  
251 author as the corresponding author. Based on the survey results, most people will assume that  
252 this person “uploaded the files, managed the revisions and wrote the response to reviewers, and  
253 took responsibility for the paper after publication”, but 19% will think it simply means that that  
254 is the person who uploaded the files. Thus, there is substantial variation in how people view  
255 corresponding authorship, including whether it is viewed as something that indicates something  
256 larger about responsibility for the work reported in the manuscript. Further work on this topic –  
257 especially studies that collect qualitative data on the topic – would be useful for understanding  
258 current views on corresponding authorship. One potential focus for such studies is whether  
259 corresponding authorship is perceived differently depending on whether the corresponding  
260 author is the first or last author, as was found in a survey of medical school department chairs

261 (Bhandari et al. 2014). Based on the combination of poll results and current corresponding  
262 authorship practices, a reasonable starting point for discussions of authorship on ecology articles  
263 would be to have the lead author be the corresponding author on a paper noting that, in doing so,  
264 many readers will assume that means that person is taking full responsibility for the paper.

265 Authorship carries with it both credit and responsibility, and the order of authorship can  
266 convey information about how much credit and responsibility an author of a multi-authored  
267 paper deserves. However, because of variation across fields and over time, what is indicated by  
268 last authorship and corresponding authorship is not necessarily clear. My analyses indicate that  
269 most ecologists view the last author as the “senior” author on a paper (that is, the head of the lab  
270 where the majority of the work was carried out), that the first author tends to be the  
271 corresponding author on ecology papers, and that most ecologists interpret corresponding  
272 authorship as taking full responsibility for a paper. Thus, in addition to agreeing with earlier calls  
273 to discuss authorship early and often (Weltzin et al. 2006), I suggest that those discussions have  
274 as their starting point that the last author is the senior author and the first author is the  
275 corresponding author.

276

## 277 **Acknowledgments**

278 This poll was confirmed as exempt from ongoing IRB review (UMich IRB #: HUM00114140).  
279 The poll was developed with input from Alex Bond, Linda Campbell, Kathy Cottingham, and  
280 Andrea Kirkwood, who all helped me think through what to ask about and how to phrase the  
281 questions and answer options. Thanks to Rayna Harris for introducing me to the Likert package  
282 and providing code for the initial version of Figure 2.

283

284 **Literature Cited**

- 285 Bhandari, M., G. H. Guyatt, A. V. Kulkarni, P. J. Devereaux, P. Leece, S. Bajammal, D. Heels-  
286 Ansdell, and J. W. Busse. 2014. Perceptions of authors' contributions are influenced by  
287 both byline order and designation of corresponding author. *Journal of Clinical*  
288 *Epidemiology* **67**:1049-1054.
- 289 Cozzarelli, N. R. 2004. Responsible authorship of papers in PNAS. *Proceedings of the National*  
290 *Academy of Sciences of the United States of America* **101**:10495.
- 291 Davis , P. J., and R. I. Gregerman 1969. Parse Analysis: A New Method for the Evaluation of  
292 Investigators' Bibliographies. *New England Journal of Medicine* **281**:989-990.
- 293 Eggert, L. D. 2011. Best practices for allocating appropriate credit and responsibility to authors  
294 of multi-authored articles. *Frontiers in Psychology* **2**:6.
- 295 Fox, C. W., C. S. Burns, A. D. Muncy, and J. A. Meyer. 2016. Gender differences in patterns of  
296 authorship do not affect peer review outcomes at an ecology journal. *Functional Ecology*  
297 **30**:126-139.
- 298 Fox, J. W. 2016. Views on authorship and author contribution statements: poll results, part 2.  
299 *Dynamic Ecology*.
- 300 Johnson, S. 2006. Are ecologists becoming more gregarious? *Bulletin of the British Ecological*  
301 *Society* **37**:23.
- 302 Kalisz, S., and J. A. Teeri. 1986. Population-Level Variation in Photosynthetic Metabolism and  
303 Growth in *Sedum Wrightii*. *Ecology* **67**:20-26.
- 304 Laurance, W. F. 2006. Second thoughts on who goes where in author lists. *Nature* **442**:26-26.
- 305 Logan, J. M. 2016. Historical changes in co-author numbers in ecology. *Frontiers in Ecology and*  
306 *the Environment* **14**:297-299.

- 307 Moss-Racusin, C. A., J. F. Dovidio, V. L. Brescoll, M. J. Graham, and J. Handelsman. 2012.  
308 Science faculty's subtle gender biases favor male students. *Proceedings of the National*  
309 *Academy of Sciences* **109**:16474-16479.
- 310 Mouloupoulos, S. D., D. A. Sideris, and K. A. Georgilis. 1983. Individual contributions to  
311 multiauthor papers. *British Medical Journal* **287**:1608-1610.
- 312 Murcia, C., and P. Feinsinger. 1996. Interspecific Pollen Loss by Hummingbirds Visiting Flower  
313 Mixtures: Effects of Floral Architecture. *Ecology* **77**:550-560.
- 314 Rennie, D., A. Flanagin, and V. Yank. 2000. The contributions of authors. *Jama-Journal of the*  
315 *American Medical Association* **284**:89-91.
- 316 Rennie, D., V. Yank, and L. Emanuel. 1997. When authorship fails - A proposal to make  
317 contributors accountable. *Jama-Journal of the American Medical Association* **278**:579-  
318 585.
- 319 Tschardtke, T., M. E. Hochberg, T. A. Rand, V. H. Resh, and J. Krauss. 2007. Author Sequence  
320 and Credit for Contributions in Multiauthored Publications. *Plos Biology* **5**:e18.
- 321 Venkatraman, V. 2010. Conventions of scientific authorship. *Science*.
- 322 Waltman, L. 2012. An empirical analysis of the use of alphabetical authorship in scientific  
323 publishing. *Journal of Informetrics* **6**:700-711.
- 324 Weltzin, J. F., R. T. Belote, L. T. Williams, J. K. Keller, and E. C. Engel. 2006. Authorship in  
325 ecology: attribution, accountability, and responsibility. *Frontiers in Ecology and the*  
326 *Environment* **4**:435-441.
- 327 Wren, J. D., K. Z. Kozak, K. R. Johnson, S. J. Deakyne, L. M. Schilling, and R. P. Dellavalle.  
328 2007. The write position - A survey of perceived contributions to papers based on byline  
329 position and number of authors. *Embo Reports* **8**:988-991.
- 330

331 **Table 1.** Primary research area of respondents to poll on last and corresponding authorship,  
332 sorted in decreasing order of commonness.

| <b>Primary Research Area</b>                                   | <b>%</b> |
|----------------------------------------------------------------|----------|
| ecology (primarily field-based)                                | 50       |
| ecology (primarily computational-based)                        | 19       |
| evolutionary biology (primarily organismal)                    | 12       |
| ecology (primarily wet-lab based, including molecular ecology) | 11       |
| evolutionary biology (primarily molecular)                     | 5        |
| biology other than EEB                                         | 2        |
| outside biology                                                | 2        |

333

334 **Table 2.** Number of years since receiving PhD for poll respondents.

| <b>Years since PhD</b>                  | <b>%</b> |
|-----------------------------------------|----------|
| 0 (current students should choose this) | 28       |
| 1-5                                     | 31       |
| 6-10                                    | 18       |
| 11-15                                   | 12       |
| 16-20                                   | 5        |
| >20                                     | 5        |
| no PhD and not a current student        | 2        |

335

336 **Table 3.** Geographic location of poll respondents, sorted alphabetically.

| <b>Continent</b> | <b>%</b> |
|------------------|----------|
| Africa           | 1        |
| Asia             | 1        |
| Australia        | 6        |
| Europe           | 26       |
| North America    | 64       |
| South America    | 3        |

337

338



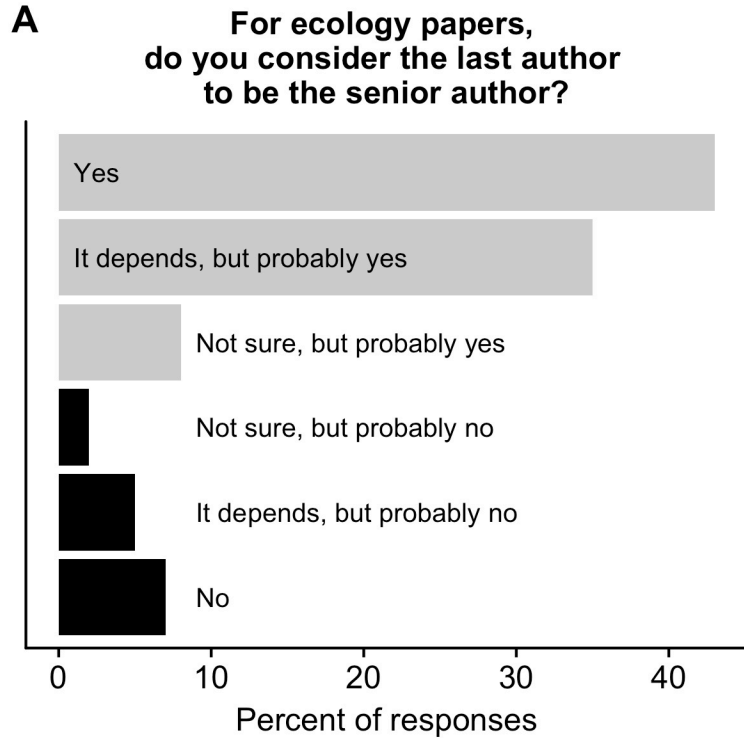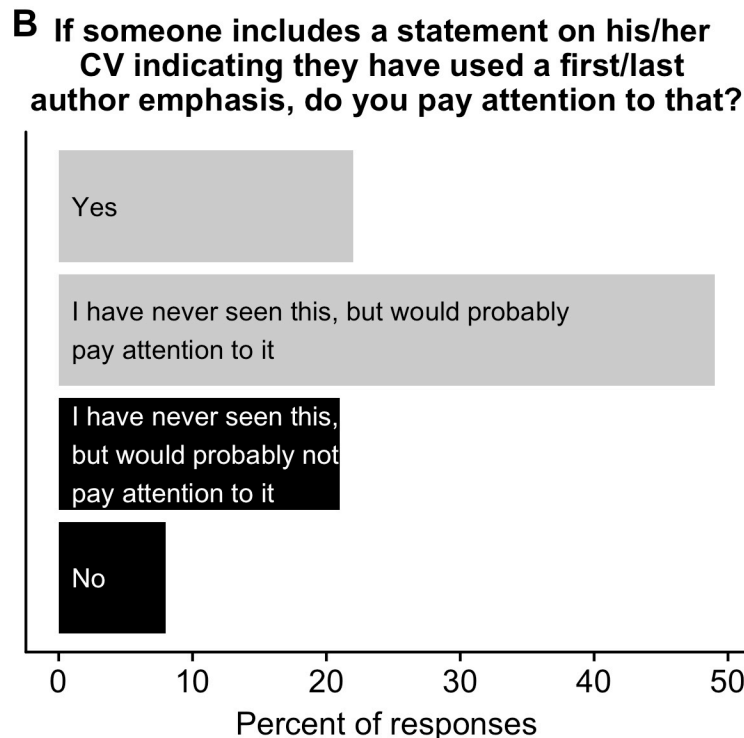

339

340 **Figure 1.** Views of poll respondents on A) whether the last author of a paper is the senior author  
341 and B) whether they would pay attention to a statement on the CV indicating that the last author  
342 position was one of emphasis.

343

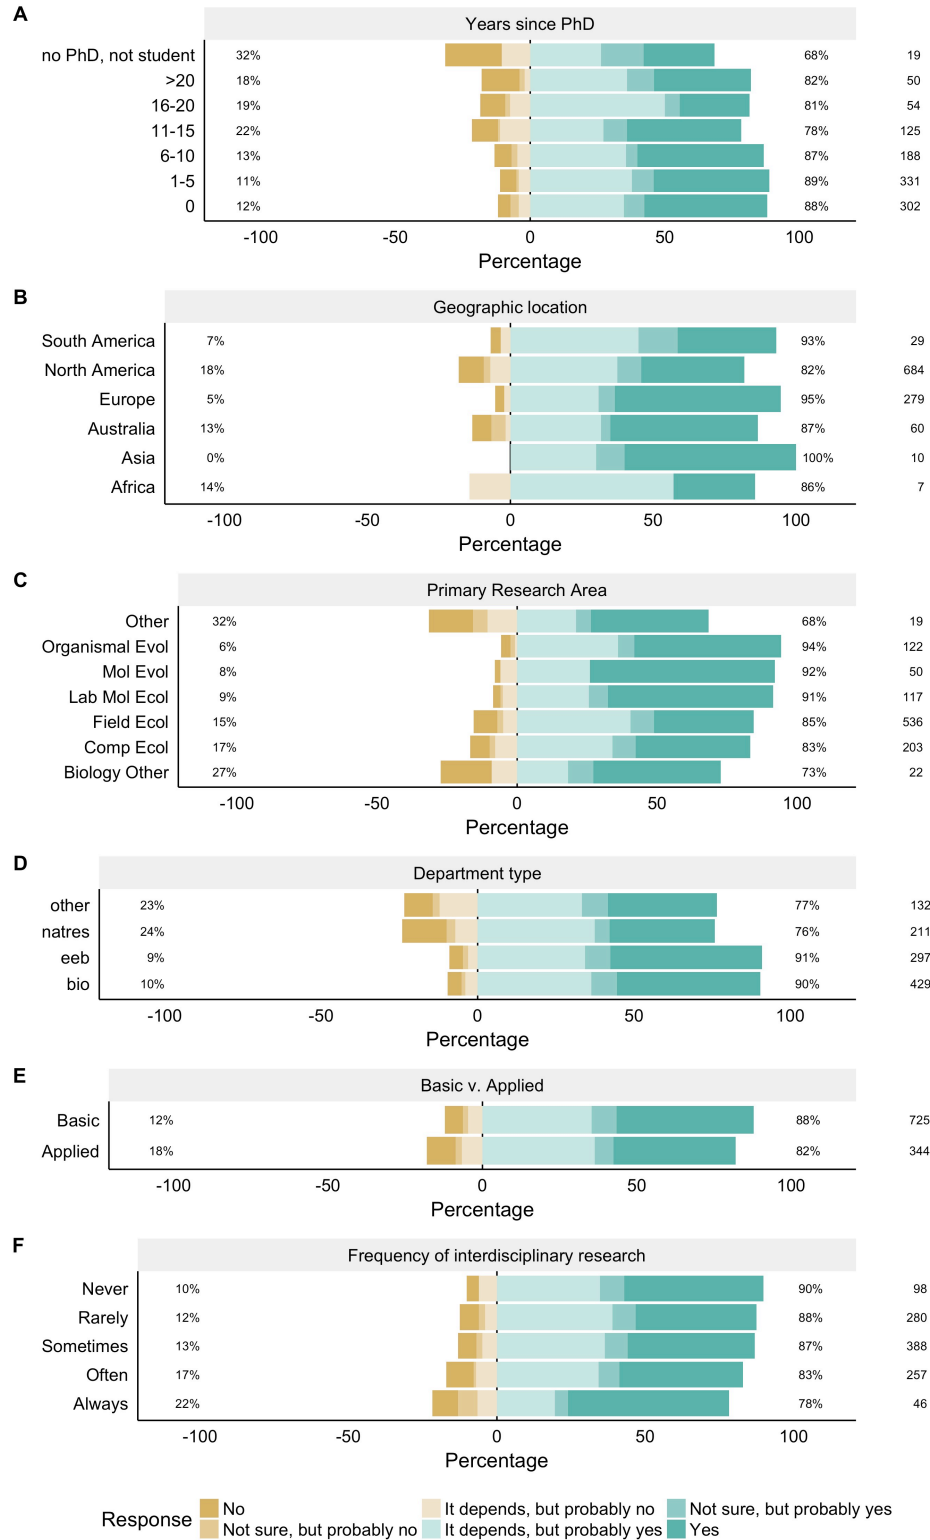

344  
345  
346  
347  
348

**Figure 2.** Variation in views on last authorship by career stage, geographic location, research area, and department type. The bars shaded in greens are positive responses to the question “For ecology papers, do you consider the last author to be the senior author”, whereas gold responses are negative responses (as described in the figure legend). The percentage on the right gives the

349 total percentage of positive responses, while the percentage on the left gives the total percentage  
350 of negative responses for a group. The number on the right hand side shows the number of  
351 respondents in a given category (e.g., 29 respondents indicated that they live in South America).  
352

353

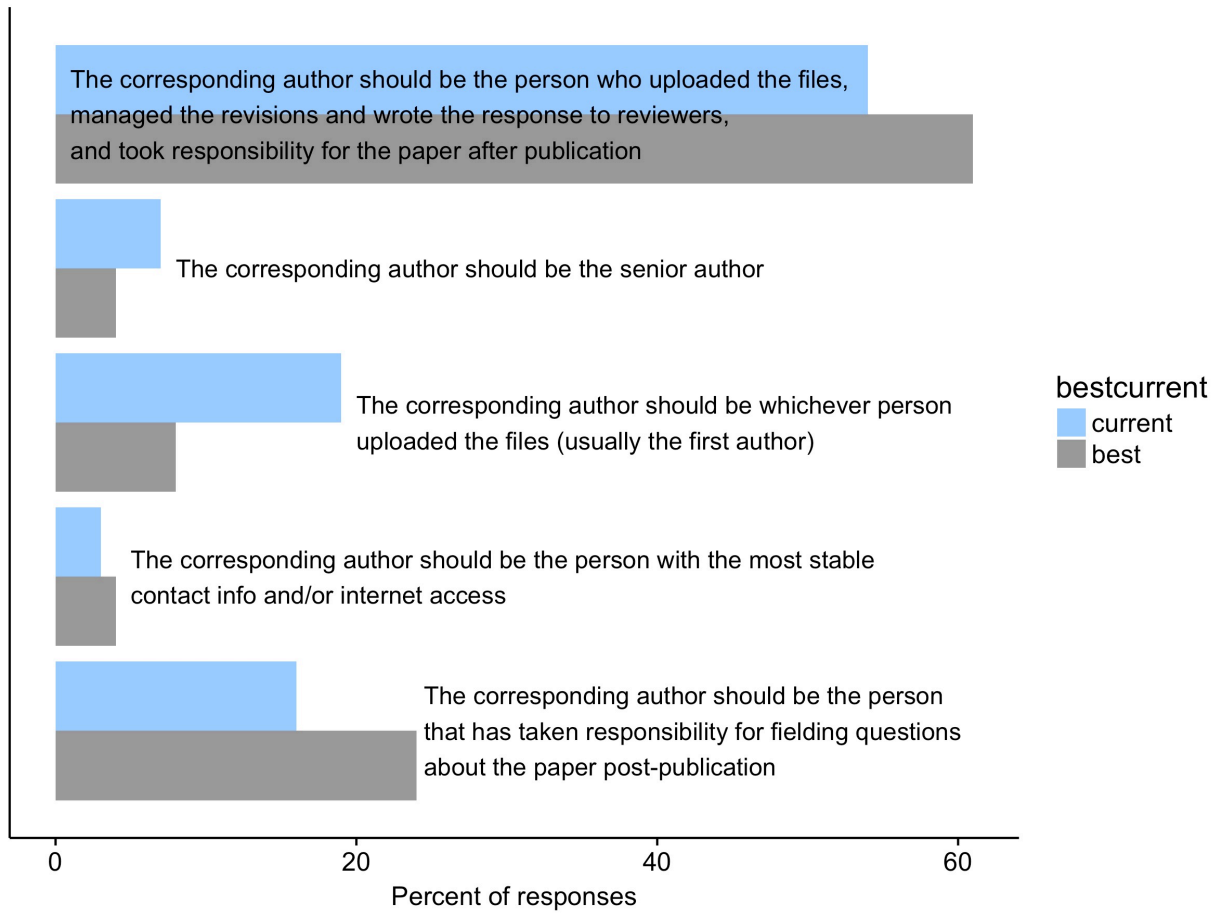

354

355

356 **Figure 3.** Views of poll respondents on current (light blue) and best (gray) practices for  
357 corresponding authorship.

358

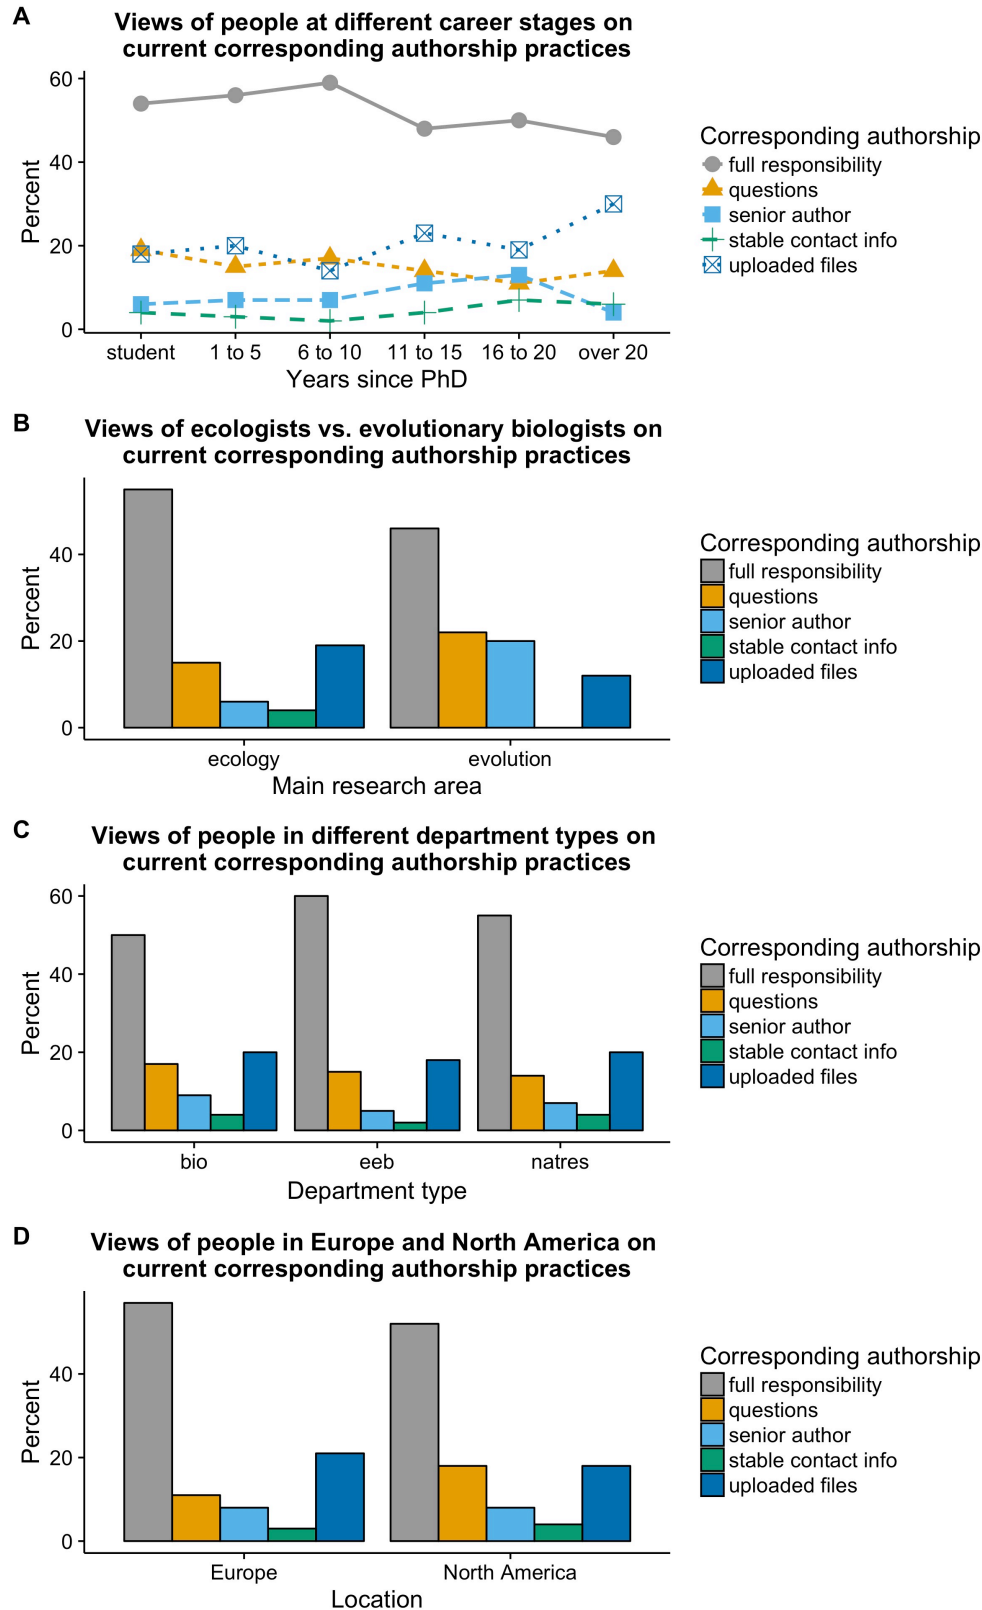

359  
360  
361

**Figure 4.** Influence of career stage, research area, department type, and geographic location on views on current corresponding authorship practices.

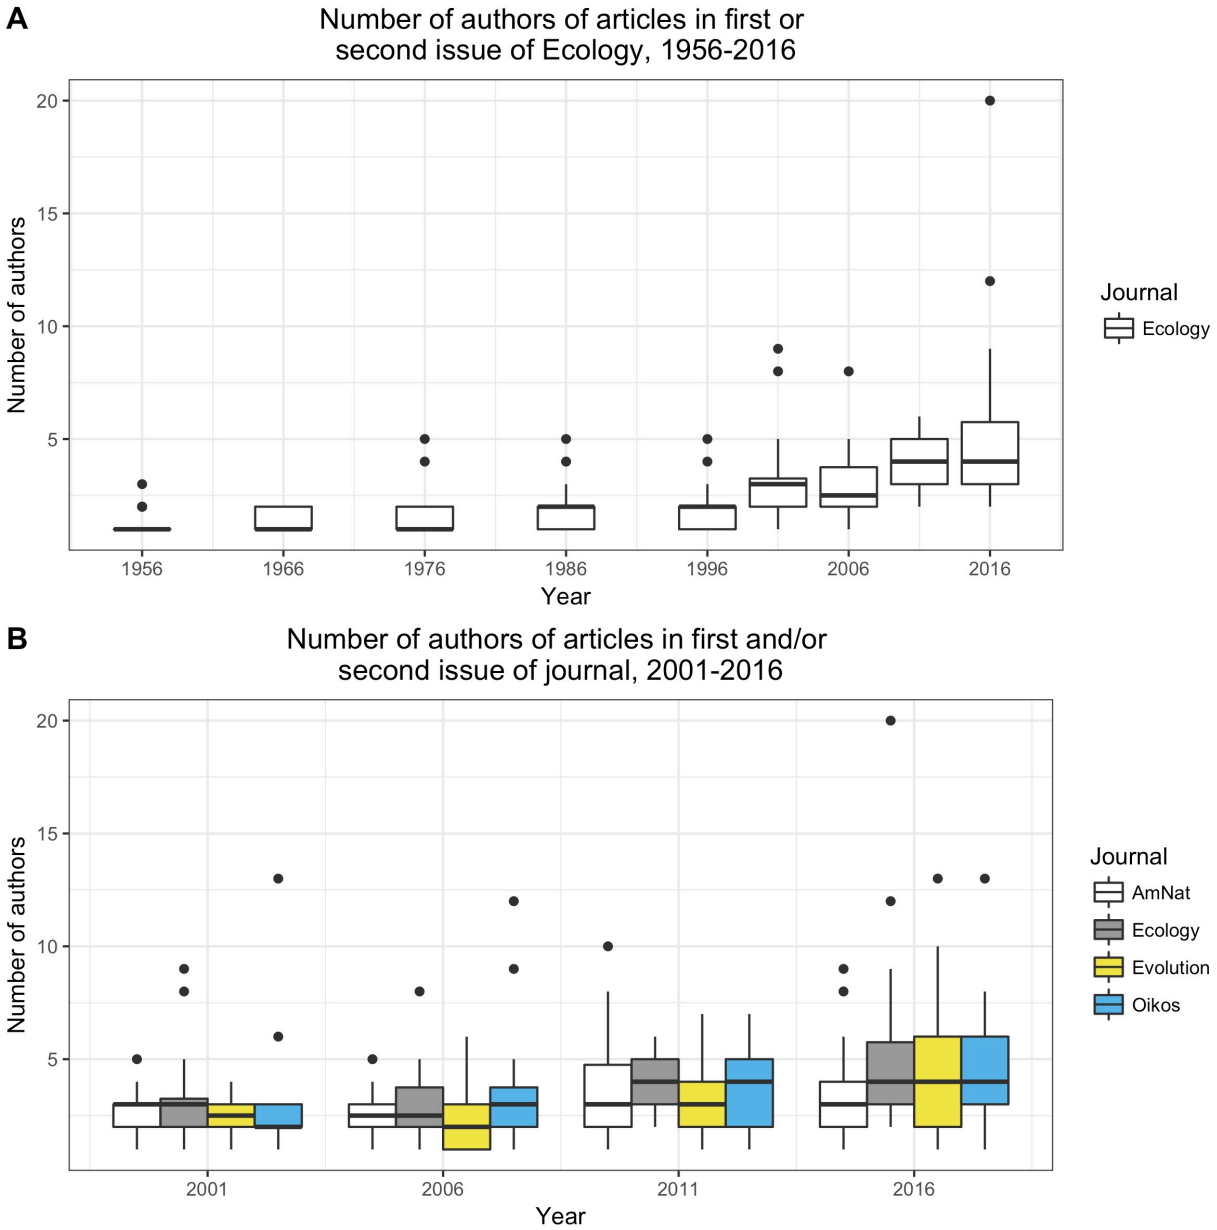

362  
363  
364  
365  
366  
367

**Figure 5.** Number of authors on papers in *American Naturalist*, *Ecology*, *Evolution*, and *Oikos* over time. See methods for more information on which journal issues were analyzed. A) Data for *Ecology* for 1956-2016. B) Data for *American Naturalist*, *Ecology*, *Evolution*, and *Oikos* for 2001-2016.

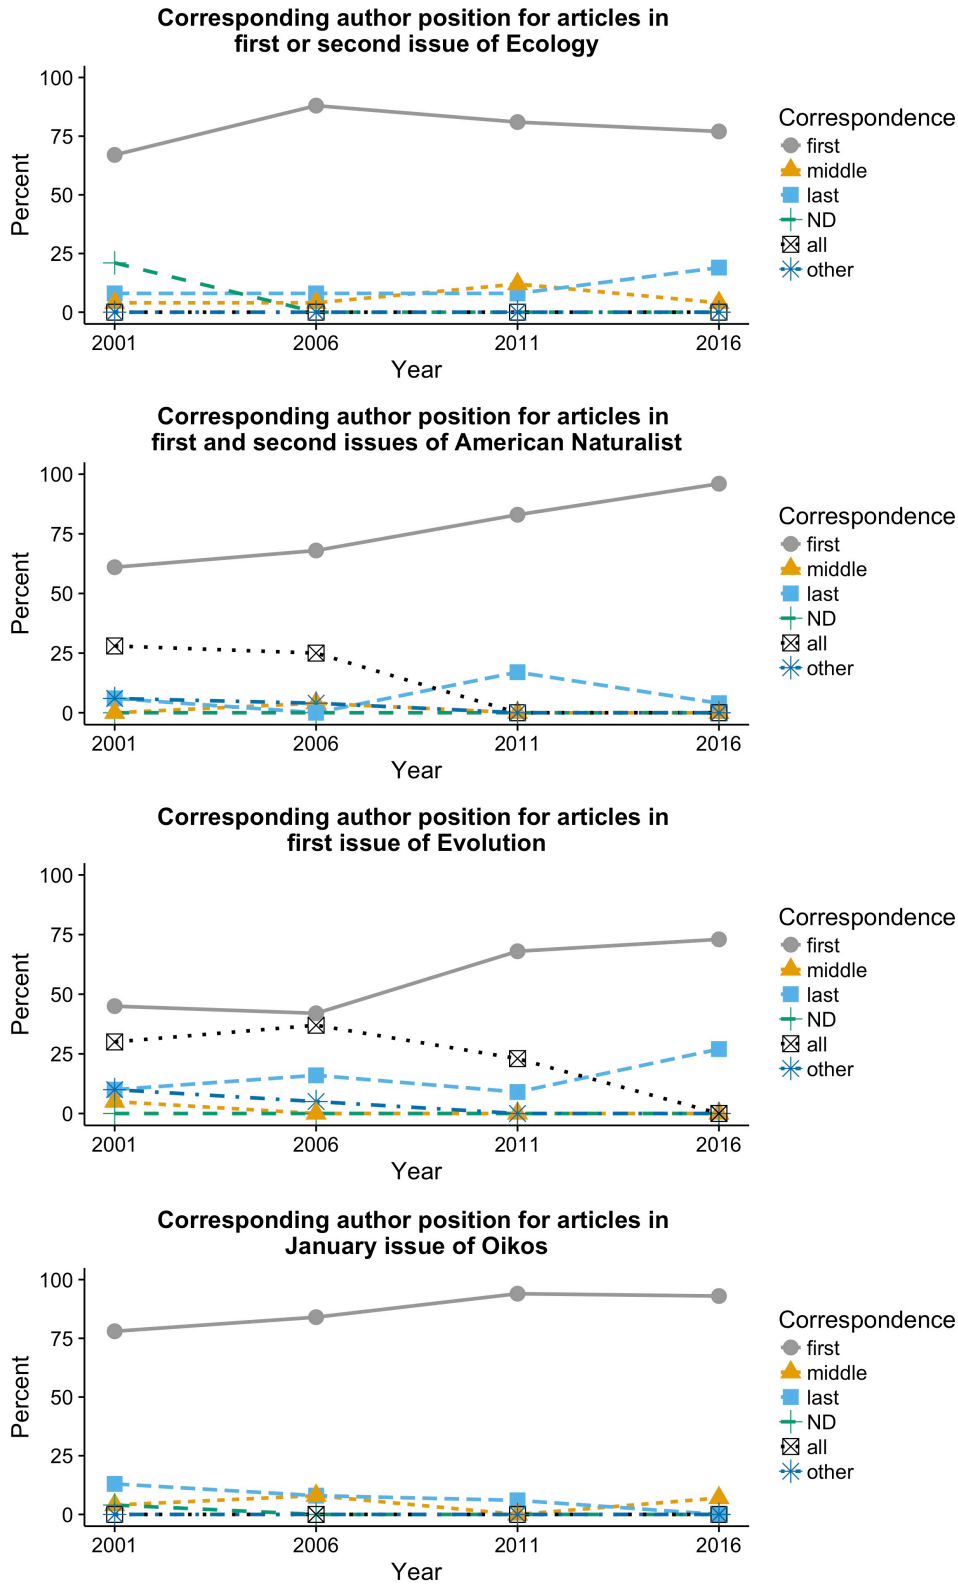

368  
369  
370

**Figure 6.** Corresponding author position for articles in the first and/or second issue of the journals *American Naturalist*, *Ecology*, *Evolution*, and *Oikos*.

## Supplementary Material

### Survey

The complete survey is given here.

1. For ecology papers, do you consider the last author to be the senior author?

- Yes
- No
- Not sure, but probably yes
- Not sure, but probably no
- It depends, but probably yes
- It depends, but probably no

2. Which of the following statements most closely matches the current norms in ecology in terms of who is corresponding author?

- The corresponding author is usually the person who uploaded the files (usually the first author)
- The corresponding author is usually the senior author
- The corresponding author is the person with the most stable contact info and/or internet access
- The corresponding author uploaded the files, managed the revisions and wrote the response to reviewers, and took responsibility for the paper after publication
- The corresponding author is the person that has taken responsibility for fielding questions about the paper post-publication

3. Which of the following statements would be the best practice in terms of who is corresponding author?

- The corresponding author should be whichever person uploaded the files (usually the first author)
- The corresponding author should be the senior author
- The corresponding author should be the person with the most stable contact info and/or internet access
- The corresponding author should be the person that has taken responsibility for fielding questions about the paper post-publication
- The corresponding author should be the person who uploaded the files, managed the revisions and wrote the response to reviewers, and took responsibility for the paper after publication

4. If someone includes a statement on his/her CV indicating they have used a first/last author emphasis, do you pay attention to that?

- Yes
- No
- I have never seen this, but would probably pay attention to it
- I have never seen this, but would probably not pay attention to it



5. What is your primary research area?

- Ecology (primarily field-based)
- Ecology (primarily wet-lab based, including molecular ecology)
- Ecology (primarily computational-based)
- Evolutionary biology (primarily molecular)
- Evolutionary biology (primarily organismal)
- Biology other than EEB
- Outside biology

6. Is your research primarily basic or applied?

- Basic
- Applied

7. How frequently do you conduct interdisciplinary research (i.e., publish research with co-authors outside of your discipline)?

- Never
- Rarely
- Sometimes
- Often
- Always

8. How many years post-PhD are you?

- 0
- 1-5
- 6-10
- 11-15
- 16-20
- >20
- I do not have a PhD and am not a current student

9. Where do you live?

- Africa
- Asia
- Australia
- Europe
- North America
- South America

10. Which best describes your current department?

- An EEB department (or similar)
- A biology department
- A natural resources department (or similar)
- other
